# Supplementary material
Source: Springer Nature journal article supplement (https://www.springermedizin.de/resource/supplementary/12943_2011_1009_MOESM2_ESM.pdf/9552100)

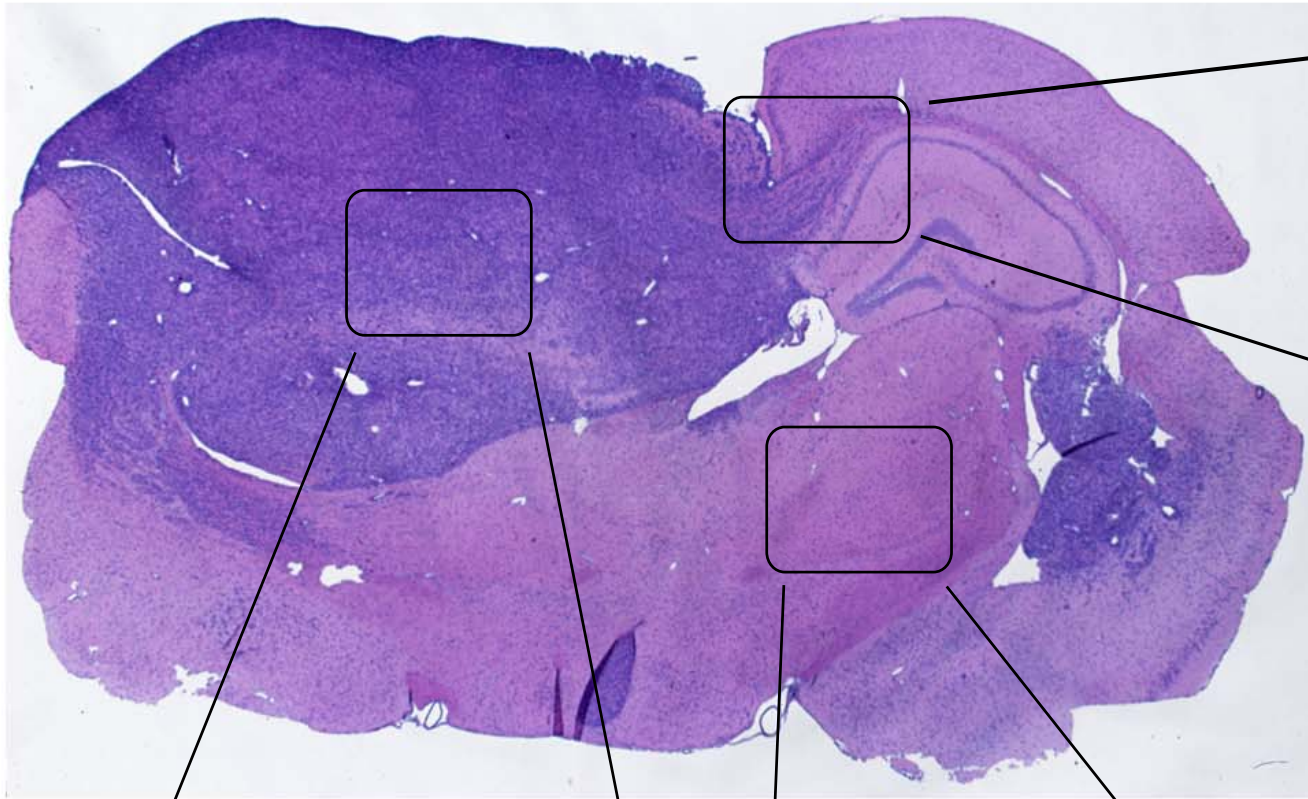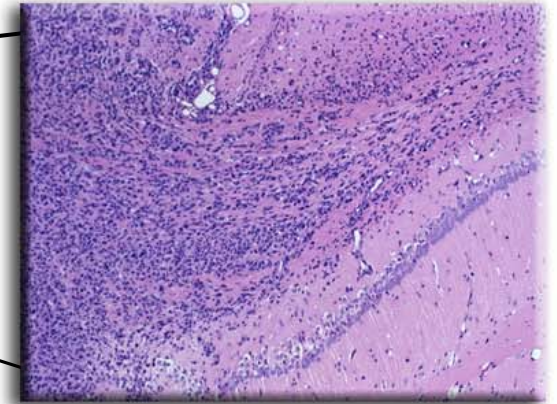

Invasive tumor edge

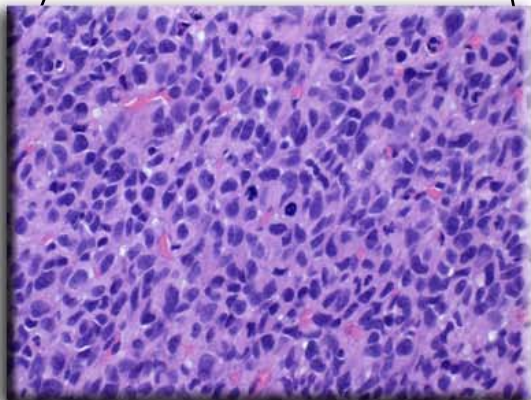

Tumor core

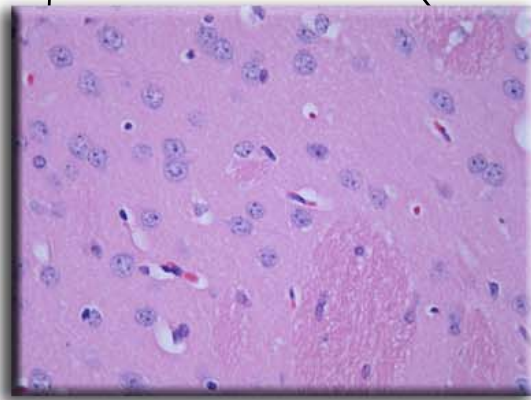

Normal mouse brain

Supplement: MOESM2 [file 9552100]
